# Supplementary material for: Translocation of the ABC transporter ABCD4 from the endoplasmic reticulum to lysosomes requires the escort protein LMBD1
Source: PubMed Central journal article supplement (PMC4960490; doi:10.1038/srep30183), 2016-07-26
Supplement: srep30183-s1.pdf [file srep30183-s1.pdf]

## **Article**

### **Title:**

Translocation of the ABC transporter ABCD4 from the endoplasmic reticulum to lysosomes requires the escort protein LMBD1

### **Author names and affiliations:**

Kosuke Kawaguchi<sup>1</sup>, Takumi Okamoto<sup>1</sup>, Masashi Morita and Tsuneo Imanaka<sup>\*</sup>

Department of Biological Chemistry, Graduate School of Medicine and Pharmaceutical Sciences, University of Toyama, 2630 Sugitani, Toyama 930-0194, Japan

<sup>\*</sup>Correspondence and requests for materials should be addressed to T.I.

E-mail: [imanaka@pha.u-toyama.ac.jp](mailto:imanaka@pha.u-toyama.ac.jp)

Phone: +81-76-434-7545

Fax: +81-76-434-7545;

<sup>1</sup>These authors contributed equally to this work.

Table S1 List of oligonucleotide primers

| Primer name         | 5'- sequence-3'                                                             |
|---------------------|-----------------------------------------------------------------------------|
| Fw-inv-ABCD4-HA     | CAGACTACGCTGGTTACCCGTACGATGTACCAGACTACGCTTGACTC<br>GAGTCTAGAGGGCCCGTTTAAAC  |
| Rv-inv-ABCD4-HA     | GTACATCGTACGGGTAACCAGCGTAGTCTGGTACATCGTACGGGTAT<br>TCCACTTTGAT TCTCATCAGCTC |
| Fw-D1-TM1           | CGGTTCCCTGTGGCTCCTGCGGCTGCTGTTC                                             |
| Rv-D1-TM1           | GTCTTTGTTGACGATGCAGCGGGCCAGCC                                               |
| Fw-D1-TM2           | AACAAAGACCCGCGGGCCTTTGGCTGGCAG                                              |
| Rv-D1-TM2           | GTAGAGGCGGTAGGCGTGGGCCACCAGACG                                              |
| Fw-D1-TM3           | CCGGACCAGTCTCTGACGGAGGACGTGG                                                |
| Rv-D1-TM3           | GCACTGGTAGGAAGTCACAGCCACGTCCAG                                              |
| Fw-D1-TM4           | GACCGTGGTGCTGCGGGCCTTCTCGCC                                                 |
| Rv-D1-TM4           | GTAGAAAGCGATCTCCTCCGAGTTGGCCAC                                              |
| Fw-D1-TM5           | CATGTGGAGCTGGCCCTGCTACAGCGCTCC                                              |
| Rv-D1-TM5           | GGGGATTGCCACCATGAGCAGGCCCGAG                                                |
| Fw-D1-TM6           | CCCGCAGAGCGCACAGAAGCCTTCACTATTGCC                                           |
| Rv-D1-TM6           | GTAGCCAGCCAGCTCCGTCACCTCCTTGTACGAC                                          |
| Fw-D4-invTM1        | CTGCATCGTCAACAAAGACTTGGAAAGGGTTTAAAGACTC                                    |
| Rv-D4-invTM1        | CAGGAGCCACAGGAACCGCTGGAGAAATTG                                              |
| Fw-D4-invTM2        | CACGCCTACCGCCTCTACTTCCGGGGCC                                                |
| Rv-D4-invTM2        | GGCCCGCGGGTCTTTGTTTCCCAGGACC                                                |
| Fw-D4-invTM3        | GTGACTTCCTACCAGTGCTTCCAAAGCACAGGC                                           |
| Rv-D4-invTM3        | CGTCAGAGACTGGTCCGGTTATCGATGTC                                               |
| Fw-D4-invTM4        | GAGGAGATCGCTTTCTACAGAGCTGGGCATGTGG                                          |
| Rv-D4-invTM4        | GGCCCGCAGCACACCGGTCCCCAGGATG                                                |
| Fw-D4-invTM5        | CTCATGGTGGCAATCCCCATTTTCAGCGGG                                              |
| Rv-D4-invTM5        | GGGCCAGCTCCACATGCCAGCTCTGTAG                                                |
| Fw-D4-invTM6        | CGGAGCTGGCTGGCTACACGCACAGAATTG                                              |
| Rv-D4-invTM6        | CTTCTGTGCGCTCTGCGGGACTCAGGTCTC                                              |
| Fw-LMBD1-Kpn        | CTGGTACCATGGCGACTTCTGGCG                                                    |
| Rv-LMBD1-Xho        | GCATCTCGAGTCAAGCAGAATAGACAGAGG                                              |
| Fw-LMBD- Cla        | GATGACCTCGAGTCTAGAGGGCC                                                     |
| Rv-LMBD- Cla        | GATAGCAGAATAGACAGAGGGCTCATCATC                                              |
| Fw-LMBD1-del1405G   | ATGCTCCTGAAGATCAGTGTACTGTTACC                                               |
| Rv-LMBD1-del1405G   | TGCATCACATCTCTTTGGCACAGAAAGG                                                |
| Fw-LMBD1-del848-851 | GCATTTAGAATTCATTGAAAACAGCTGGTGG                                             |
| Rv-LMBD1-del848-851 | CTCTCTTCTTAAAGTGTTTCGTAACCTTTCTTC                                           |
| Fw-mutLMBD1-GFP     | ATCGATATGGTGAGCAAGGGCGAGGAGC                                                |
| Rv-mutLMBD1-D469fs  | AAAATACCCCAAGAAAGGCCAGTTACCAAAATAG                                          |
| Rv-mutLMBD1-K281fs  | AATGCCTCTCTTCTTAAAGTGTTTCGTAACCTTTCTTC                                      |
| Fw-LMBD1-233AAAA    | CAGCTGCGGAAAACACTGAAGACATTGAAG                                              |

|                  |                                       |
|------------------|---------------------------------------|
| Rv-LMBD1-233AAAA | CAGCAGCAGCGCTTCTAGTGCCTTTTATC         |
| Fw-LMBD1-294AAAA | CTTGTGGCGCTCTGCGTCCCCTGAAGATC         |
| Rv-LMBD1-294AAAA | CTGCTGCCGCCAGCTGTTTTCAATGAATTCTAAATGC |
| Fw-GFP- Cla      | ATCGATATGGTGAGCAAGGGCGAGG             |
| Rv-GFP- Cla      | ATCGATTTACTTGTACAGCTCGTCCATGCC        |

---

## **Supplementary Figure Legends**

**Supplementary Figure 1 - Stable expression of LMBD1-GFP in CHO cells.** PNS was prepared from CHO cells with or without the expression of LMBD1-GFP. LMBD1-GFP was detected by immunoblot analysis using an anti-GFP antibody.

**Supplementary Figure 2 - Interaction between ABCD4 and LMBD1.** ABCD4-HA constructs were transfected to CHO cells with or without the expression of LMBD1-GFP. Cell homogenates from the cells were treated with 1% digitonin and subjected to immunoprecipitation using an anti-GFP antibody. Co-precipitate proteins were analyzed by SDS-PAGE followed by immunoblotting using an anti-HA antibody.

**Supplementary Figure 3 - Interaction between ABCD4-HA and ABCD4-His.** ABCD4-His constructs were transfected to HuH7 cells with or without the expression of ABCD4-HA. Cell homogenates from the cells were treated with 1% digitonin and subjected to immunoprecipitation using an anti-HA antibody. Co-precipitated proteins were analyzed by SDS-PAGE followed by immunoblotting using an anti-His antibody.

**Supplementary Figure 4 - Amino acid sequence alignment of ABCD4, ABCD1 and CmABCB1.** Each of the shaded sequences was exchanged between ABCD4 and ABCD1.

**Supplementary Figure 5 - Subcellular localization of LMBD1(K281fs)-GFP in HEK293 cells.** The distribution of LMBD1(K281fs)-GFP was compared with that of ER or lysosomes labeled with anti-KDEL and anti-LAMP1, respectively. Bar, 20  $\mu$ m.

**Supplementary Figure 6 - Subcellular localization of ABCD4-HA in HEK293 cells**

**expressing mutant LMBD1-GFP.** The distribution of ABCD4-HA and LMBD1(295WTKF/AAAA)-GFP was compared with that of lysosomes stained with anti-LAMP1. Bar, 20  $\mu$ m.

**Supplementary Figure 7 - Construction of *LMBRD1* knockout cells.** (A) Sequence analysis of HEK293 cells injected with PX459-lmbrd1 targeting *LMBRD1* gene. The PCR products were analyzed by direct sequencing to identify mutations in *LMBRD1*. (B) PNS was prepared from wild type and *LMBRD1* knockout cells. LMBD1 was detected by immunoblot analysis using an anti-LMBD1 antibody (left) and an anti-Actin antibody (right). (C) Detection of endogenous ABCD4 in HEK293 cells. PNS (1.5 mg) from the wild type or *LMBRD1* knockout cells was concentrated by  $\text{Na}_2\text{CO}_3$  treatment. PNS (10  $\mu$ g) of CHO cells expressing ABCD4 was used as the positive control. Endogenous ABCD4 was detected by immunoblot analysis using an anti-ABCD4 antibody. The asterisk indicates a non-specific signal.

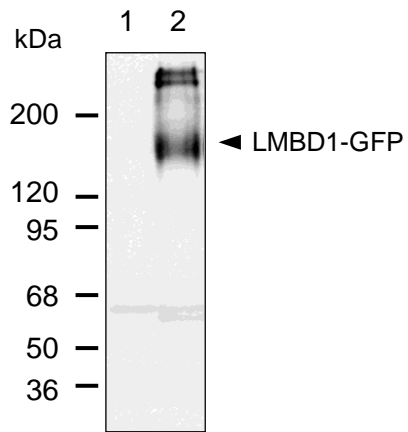

Kawaguchi et al. Figure S1

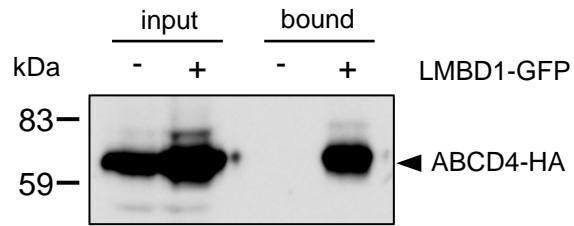

Kawaguchi et al. Figure S2

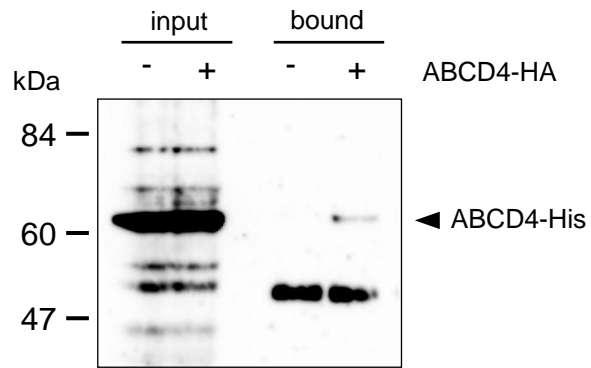

Kawaguchi et al. Figure S3



*Ctr*ABCB1 MNAAHAQSFETANYSSVGENHRETLSSSI YETDPVSPDTAVSSEATAFQESFPSLKLKEKDPNRRRWRWFWARPSAAGEDPEAGDPKKAASGPESAY 100  
*Hs*ABCD1 MPVL SRPRPWRGNTLKR TAVLL-----ALAA-----YGAHKVYPLVRQCLAPARGLQAPAGEPTQEASGV-----AAAKAGMNRVF----LQ 73  
*Hs*ABCD4 MAVAGPAPGAGARP-----RDL LQF----LQ 22


  
*Ctr*ABCB1 TTGVTARR I FALAWSSSATMI V I GF I AS I LEGATLP AFA I V -FGRMFQVFTKSKSQ I EGETWKYSVGFVGI GVFEF I VAGSR T ALFG I ASERLARDLRVA 199  
*Hs*ABCD1 RLLWLLRLLFPRVL CRETG L LALHSAAL VSR TFLSVYVARLDGRLARC I VRKDPRAFQWQLLQWLL I ALPATFVNSA I RYLEGQLAL SFRSRLVAHAYRL 173  
*Hs*ABCD4 RFLQ I LKVLFPSSQNALMFL TLLCL T LLEQFV I YQVGL I PSQYYGVLGNKDL EGFKTL TFLAVML I VLNSTLKSFDQFTCNLL YVSWRKDL TEHLHRL 122

chimera 1

chimera 2


  
*Ctr*ABCB1 AFSNLVEQDVTYFDRRK-----AGELGGKLNNDVQV I QYSF SKL GAVL FNL AQCVVG I I VAF I FAPAL TGVL I ALSPLVVL AGAAQMI EMSGNTKRSS 292  
*Hs*ABCD1 YFSQQTYYRVSNMDGRLRNPQQSL TEDVVAFAASVAHL YSNLTKPLLDVAVTSY TLLRAARSRGAGTAWPSA I AGLV VFL TANVLR AFSPKFGE LVAEEA 273  
*Hs*ABCD4 YFRGRAYTLNVL RDD I DNP DQR I SQDVERFCRQLSSMASKL I I SPFTLVYYTYQCQSTGWLGP-----VS I FGVI I LGTVV NKTLMGP I VMKLVHQE 216

chimera 3

chimera 4


  
*Ctr*ABCB1 EAYASAGSVAEEVFSN I RTTKAFEAEYETQRYGSKLDPL YRLGRRRY I SDGLFFGLS-----MLV I FCVYALAL WGGQL I ARGSLNL----- 376  
*Hs*ABCD1 RRGKELRYMHSRVVANSEE I AFYGGHEVELALL QRSYQDLASQ I NL I LERLWYVMLEQFLMKYVWSAGLLMVAVP I I TATGYSESDAEAVKKALEKK 373  
*Hs*ABCD4 KLEGD FRFKHMQ I RVNAEPAAFYRAGHVEHMRDRRLQRLLQTQRELMSKELWLY I GI-NTFDYLGSI SYVV I A I P I FSGVY----- 298

chimera 5


  
*Ctr*ABCB1 -----GNLLTAFFSA I L GFMGVGQAAQVWPDVTRGLGAG-----GELFAMI DRV PQYRRPDPGAEVVTQPLVLK 440  
*Hs*ABCD1 EEELVSE RTEAFT I ARNLL TAAADA I ER I MSSYKEVTELAGY TARVHEMFQVFEDVQRCHF KRPRELEDA GAGSGT I GRSGVR--VEGPLK I RGQVVDVE 471  
*Hs*ABCD4 GDLSPAEL STL VSKNAFVC I YL I SCFTQL I DLSTLSDVAGYTHR I GQLRETL DMSLKSQDCE----- I LGE--SEW--GLDTPPGWPAEPAD 384

chimera 6

*Ctr*ABCB1 QG I VFENVHFRYPTRMNEVLRGI SLT I PNGKTVA I VGGSGAGKST I I QLLMRFYD I EPQGGLL LFDGTPAWN YDFHALRSQ I GLV SQEPVLFSGT I RD 540  
*Hs*ABCD1 QG I I CEN I PI VTPSG--EVVVASLN I RVEEGMHLL I TGPNCGCKSSLFR I LGG---LWPTYGGVL YKPPPQ-----RMFY I PQRPYMSVGLSRD 555  
*Hs*ABCD4 TAFLLERVS I SAPSS-DKPL I KDLSLK I SEGQSL I TGNTGTGKTSLLRVLGG---LWTRSGSVQMLTDF-----GPHGVLF LQKPFPTDGLTRE 472

Walker A

*Ctr*ABCB1 N ILYGK-----RDATDEEV I QALREANAYSFVMALPDGLDTEVGERGLALSGGQKQRI A I ARA I LKHPTLLCLDESTSALDAESEALVQEALDRMMAS 633  
*Hs*ABCD1 QV I YPDSVEDMQRKGYSEQDLEA I LDVVHLHH I LQREGGW--EAMCDWKDVL SGG EKQR I GMARMFYHRPKYALLDECTSAVS I DVEGK---- I FQA AKD 649  
*Hs*ABCD4 QV I YPLKEVYPDSGSADDER I LRFL ELA GLSNLVARTEGLDQQVDWNNYDVLSPGEMQRLSFARLFYLQPKYAVLDEATSALTEEVESE----LYR I GQQ 568

Walker B

*Ctr*ABCB1 DGVT SVV I AHRLSTVARADL I LVMQDGVVVEQGNHSELMALGPSGFYYQLVEKQLASGDMSAA----- 696  
*Hs*ABCD1 AG I ALLS I THRPSLWKYHTHLLQFDGEG----GWKFEKLD SAA--RLSL TEEKRLEQLAG I PKMQRR LQELCQ I LGEAVAPAHVPAPSPQGPGLQGA 743  
*Hs*ABCD4 LGMTF I SVGHRQSLEKFHSLV LKCGGG----RWELMR I KVE----- 606

Kawaguchi et al. Figure S4

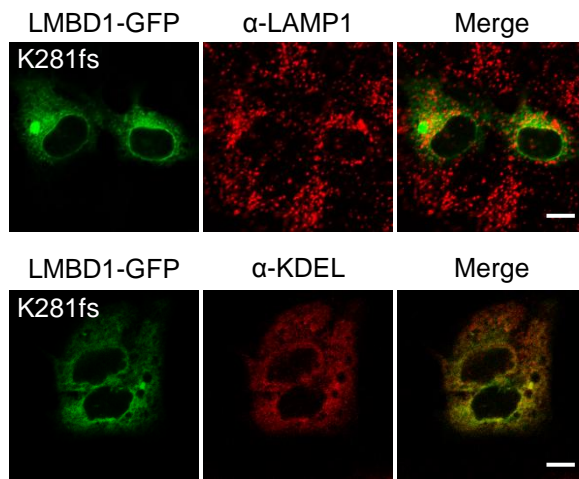

Kawaguchi et al. Figure S5

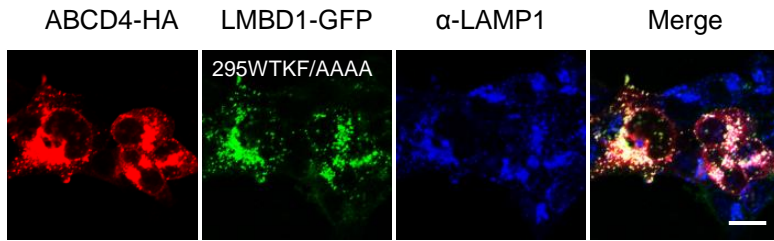

Kawaguchi et al. Figure S6

**A**

wild TGGATATATGTTTCGTAAATACCAAAGTCGGCGGGAAAGTGAAGTTGTCTC  
knockout TGGATATATGTTTCGTAAAT-CC-----GCGGGAAAGATAAGGTGTCTC

**B**

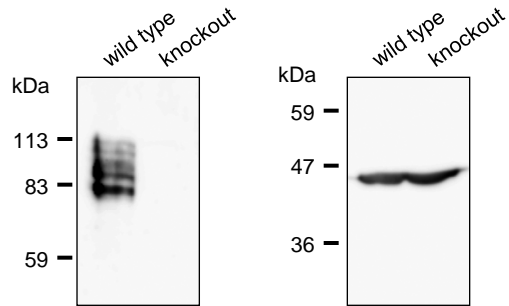

**C**

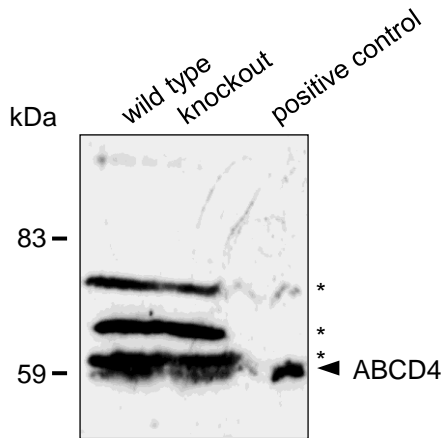

Kawaguchi et al. Figure S7
